# Supplementary material for: Allosteric substrate release by a sialic acid TRAP transporter substrate binding protein
Source: PubMed Central journal article supplement (PMC11585616; doi:10.1038/s42003-024-07263-6), 2024-11-23
Supplement: 42003_2024_7263_MOESM1_ESM.pdf [file 42003_2024_7263_MOESM1_ESM.pdf]

**Supplementary Information for:**

**Allosteric substrate release by a sialic acid TRAP transporter substrate  
binding protein**

Niels Schneberger<sup>1</sup>, Philipp Hendricks<sup>1</sup>, Martin F. Peter<sup>1,2</sup>, Erik Gehrke<sup>1</sup>, Sophie C. Binder<sup>1</sup>,  
Paul-Albert Koenig<sup>3</sup>, Stephan Menzel<sup>3</sup>, Gavin H. Thomas<sup>4</sup>, Gregor Hagelueken<sup>1,\*</sup>

<sup>1</sup> Institute of Structural Biology, University of Bonn, Venusberg-Campus 1, 53127 Bonn,  
Germany

<sup>2</sup> Present address: Biochemistry Center, Heidelberg University, Im Neuenheimer Feld 328,  
69120 Heidelberg, Germany.

<sup>3</sup> Core Facility Nanobodies, University of Bonn, Venusberg-Campus 1, 53127 Bonn,  
Germany

<sup>4</sup> Department of Biology (Area 10), University of York, York YO10 5YW, UK

\*Corresponding author

E-mail: [hagelueken@uni-bonn.de](mailto:hagelueken@uni-bonn.de)

**Supplementary Table 1:** Calculated and experimental molecular weights of SiaP-VHH complexes determined by SEC-MALS analysis.

|                      | MW <sub>exp</sub> | MW <sub>calc</sub> |
|----------------------|-------------------|--------------------|
| VcSiaP               | 32.3 kDa          | 34.057 kDa         |
| NbS001               | 15.2 kDa          | 15.776 kDa         |
| NbS002               | 15.2 kDa          | 15.403 kDa         |
| VcSiaP-NbS001        | 47.0 kDa          | 49.833 kDa         |
| VcSiaP-NbS002        | 46.5 kDa          | 49.460 kDa         |
| VcSiaP-NbS001-NbS002 | 61.6 kDa          | 65.236 kDa         |
| HiSiaP               | 33.4 kDa          | 34.160 kDa         |
| HiSiaP-NbS003        | 37.5 kDa          | 48.551 kDa         |
| HiSiaP-NbS004        | 50.0 kDa          | 50.684 kDa         |
| HiSiaP-NbS005        | 47.5 kDa          | 48.553 kDa         |
| HiSiaP-NbS006        | 47.5 kDa          | 49.382 kDa         |
| HiSiaP-NbS009        | 48.0 kDa          | 49.435 kDa         |
| HiSiaP-NbS010        | 47.5 kDa          | 49.502 kDa         |
| HiSiaP-NbS011        | 48.0 kDa          | 49.557 kDa         |

**Supplementary Table 2: Overview on the performed ITC experiments and their results.** Dissociation constants and enthalpies of binding from the presented ITC experiments. Measurements denoted by a <sup>1</sup> have been performed once (n=1), all other titrations were done in technical duplicates at least (n≥2) and mean values are given including the standard deviation as error value. The binding parameters denoted by a <sup>2</sup> were derived by applying a competitive model and using the given values for Neu5Ac vs. SiaP as parameters for the weak interaction <sup>29</sup>.

|                            | SiaP                                                         | SiaP[Neu5Ac] + VHH <sub>x</sub>                                           | SiaP[VHH <sub>x</sub> ] + Neu5Ac                             |
|----------------------------|--------------------------------------------------------------|---------------------------------------------------------------------------|--------------------------------------------------------------|
| VHH <sub>vc</sub> #1       | K <sub>D</sub> = 162 ± 24.8 nM<br>ΔH = -0.46 ± 0.07 kcal/mol | No binding <sup>1</sup>                                                   | K <sub>D</sub> = 209 nM <sup>1</sup><br>ΔH = -8.9 kcal/mol   |
| VHH <sub>vc</sub> #2       | K <sub>D</sub> = 13.0 ± 2.31 nM<br>ΔH = -9.1 ± 0.16 kcal/mol | K <sub>D</sub> = 1.97 ± 0.31 nM <sup>2</sup><br>ΔH = -9.0 ± 0.09 kcal/mol | No binding                                                   |
| VHH <sub>vc</sub> #4       | K <sub>D</sub> = 2.66 nM <sup>1</sup><br>ΔH = -9.34 kcal/mol | K <sub>D</sub> = 1.91 nM <sup>1</sup><br>ΔH = -9.37 kcal/mol              | K <sub>D</sub> = 46.1 nM <sup>1</sup><br>ΔH = -17.6 kcal/mol |
| VHH <sub>vc</sub> #5       | K <sub>D</sub> < 1 nM <sup>1</sup><br>ΔH = -14.5 kcal/mol    | K <sub>D</sub> = 4.73 nM <sup>1</sup><br>ΔH = -14.7 kcal/mol              | K <sub>D</sub> = 53.9 nM <sup>1</sup><br>ΔH = -18.3 kcal/mol |
| VHH <sub>vc</sub> #6       | K <sub>D</sub> < 1 nM <sup>1</sup><br>ΔH = -21.8 kcal/mol    | K <sub>D</sub> = 6.25 nM <sup>1</sup><br>ΔH = -21.8 kcal/mol              | K <sub>D</sub> = 56.8 nM <sup>1</sup><br>ΔH = -17.6 kcal/mol |
| VHH <sub>vc</sub> #9       | K <sub>D</sub> = 3.54 nM <sup>1</sup><br>ΔH = -14.5 kcal/mol | K <sub>D</sub> = 16.1 nM <sup>1</sup><br>ΔH = -13.2 kcal/mol              | K <sub>D</sub> = 364 nM <sup>1</sup><br>ΔH = -16.5 kcal/mol  |
| VHH <sub>vc</sub> #10      | K <sub>D</sub> = 7.49 nM <sup>1</sup><br>ΔH = -10.9 kcal/mol | K <sub>D</sub> = 51.7 nM <sup>1</sup><br>ΔH = -12.2 kcal/mol              | K <sub>D</sub> = 59.9 nM <sup>1</sup><br>ΔH = -17.3 kcal/mol |
| VHH <sub>vc</sub> #11      | K <sub>D</sub> = 12.3 nM <sup>1</sup><br>ΔH = -14.4 kcal/mol | K <sub>D</sub> = 1.59 nM <sup>1,2</sup><br>ΔH = -12.5 kcal/mol            | No binding <sup>1</sup>                                      |
| <b>No binding observed</b> |                                                              | Neu5Ac vs. VcSiaP:                                                        | K <sub>D</sub> = 211 ± 38.9 nM<br>ΔH = -10.8 ± 0.3 kcal/mol  |
| <b>Decreased affinity</b>  |                                                              | Neu5Ac vs. HiSiaP:                                                        | K <sub>D</sub> = 48.2 ± 6.98 nM<br>ΔH = -18.7 ± 1.4 kcal/mol |
| <b>Competitive effect</b>  |                                                              |                                                                           |                                                              |
|                            | <b>VcSiaP<sub>W73A</sub> (W73A)</b>                          | <b>W73A [Neu5Ac] + VHH<sub>x</sub></b>                                    | <b>W73A [VHH<sub>x</sub>] + Neu5Ac</b>                       |
| VHH <sub>vc</sub> #2       | K <sub>D</sub> = 22.8 ± 14.0 nM<br>ΔH = -5.5 ± 0.04 kcal/mol | K <sub>D</sub> = 5.41 ± 5.53 nM<br>ΔH = -8.5 ± 0.3 kcal/mol               | K <sub>D</sub> = 1200 nM <sup>1</sup><br>ΔH = -13.4 kcal/mol |
|                            |                                                              | Neu5Ac vs. VcSiaP <sub>W73A</sub> :                                       | K <sub>D</sub> = 76.9 ± 10.5 nM<br>ΔH = -12.5 ± 0.1 kcal/mol |

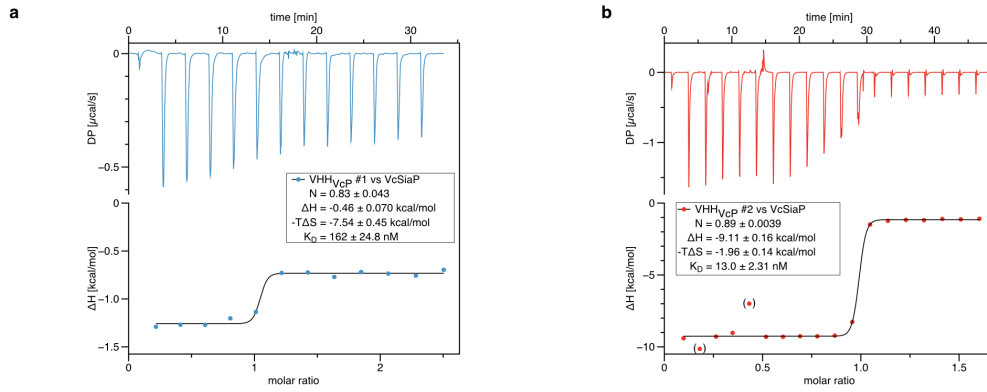

**Supplementary Fig. 1: ITC measurements for VcSiaP and its specific VHHs.** **a)** Thermogram of the titration of VHH\_VcP#1 to VcSiaP (top) and the resulting binding curve (bottom). For the thermogram the differential power (DP) is plotted against the experiment time and for the binding curve, the binding enthalpy ( $\Delta H$ ) is shown on the y-axis and the molar ratio on the x-axis. The averaged binding parameters from three independent measurements ( $n=3$ , technical replicates) are listed. **b)** The same as in a) but for the titration of VHH\_VcP#2 to VcSiaP. The data points in parentheses have not been used for calculating the fit. The titration of VHH\_VcP#2 vs VcSiaP was performed four times ( $n=4$ , technical replicates).

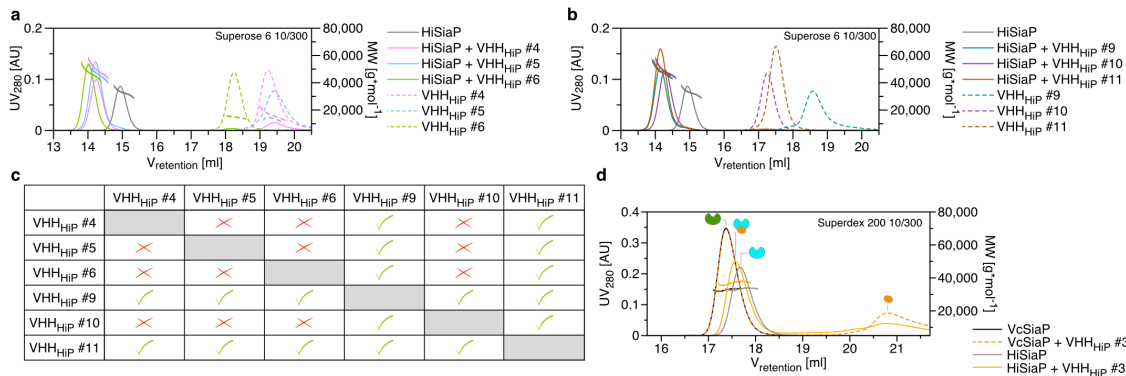

**Supplementary Fig. 2: SEC MALS measurements for HiSiaP and its specific VHHs and epitope binning.** **a)** SEC MALS measurements for the individual heterodimeric HiSiaP–VHH complexes including VHH\_HiP#4 (magenta), VHH\_HiP#5 (blue), and VHH\_HiP#6 (green). Runs of all individual components are included as reference (VHHs as dashed lines, HiSiaP as solid grey line). **b)** Same as in a) but for VHH\_HiP#9 (teal), VHH\_HiP#10 (purple), and VHH\_HiP#11 (brown). For the individual runs with only one of the VHH, only the curves for UV280 absorption are shown. **c)** Overview of all possible 1:1:1 complexes of two individual VHHs and HiSiaP. Showing three individual binding epitopes, an overlapping one for VHH\_HiP#4, VHH\_HiP#5, VHH\_HiP#6, VHH\_HiP#10, and an individual one for VHH\_HiP#9 and VHH\_HiP#11, respectively. **d)** Same as in a) and b) but for VHH\_HiP#3 + VcSiaP (yellow dashed line) and VHH\_HiP#3 + HiSiaP (yellow line), respectively. VcSiaP (black) and HiSiaP (grey) without VHH were run as control. Pictograms above the graph represent the corresponding proteins and complexes. All experiments were done once ( $n=1$ ).

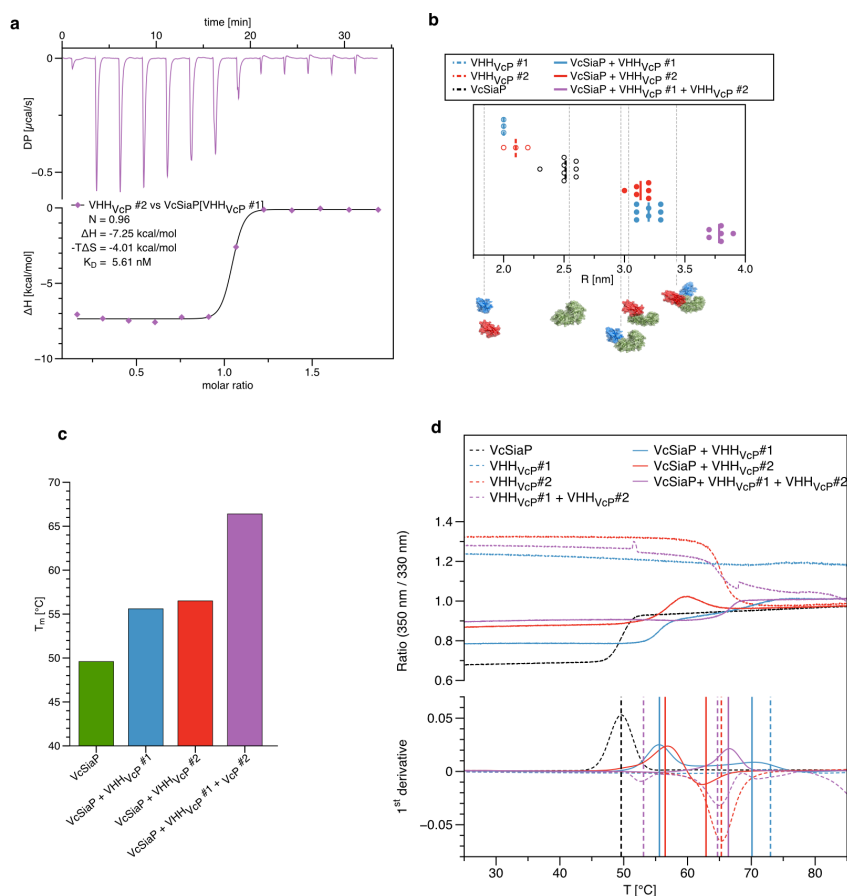

**Supplementary Fig. 3: Additional information on heterodimeric and heterotrimeric VcSiaP–VHH complexes.** **a)** Thermogram of the titration of VHH<sub>VCP</sub> #2 to VcSiaP[VHH<sub>VCP</sub> #1] (top) and the resulting binding curve (bottom). For the thermogram the differential power (DP) is plotted against the experiment time and for the binding curve, the binding enthalpy ( $\Delta H$ ) is shown on the y-axis and the molar ratio on the x-axis. The resulting binding parameters are listed. This experiment was done once ( $n=1$ ). **b)** Hydrodynamic radii of all possible heterodimeric and heterotrimeric VcSiaP–VHH complexes and all individual components. Each dot corresponds to one individual measurement which includes 20 single acquisitions  $\times$  3 seconds. The calculated radii from the crystal structures are represented by dashed grey lines and the corresponding pictogram. All experiments were done in technical replicates. VHHs only ( $n=1$ ), VcSiaP only ( $n=3$ ), VcSiaP + VHH<sub>VCP</sub>#1 ( $n=3$ ), VcSiaP + VHH<sub>VCP</sub>#2 ( $n=2$ ), VcSiaP + VHH<sub>VCP</sub>#1 + VHH<sub>VCP</sub>#2 ( $n=2$ ). Thermal nanoDSF measurements revealed that both 1:1 VcSiaP–VHH complexes are thermally stabilized by about 6 °C compared to VcSiaP. For the heterotrimeric complex, a further increased denaturation temperature was observed. **d)** Thermograms of different proteins and their complexes showing the intensity ratio of 350nm fluorescence to 330nm fluorescence (upper half) and the corresponding 1<sup>st</sup> derivatives of these curves (lower half). All curves are color-coded as explained in the caption on top. The vertical lines indicate the melting temperatures shown in c). The nanoDSF experiment was done as technical duplicate ( $n=2$ ).

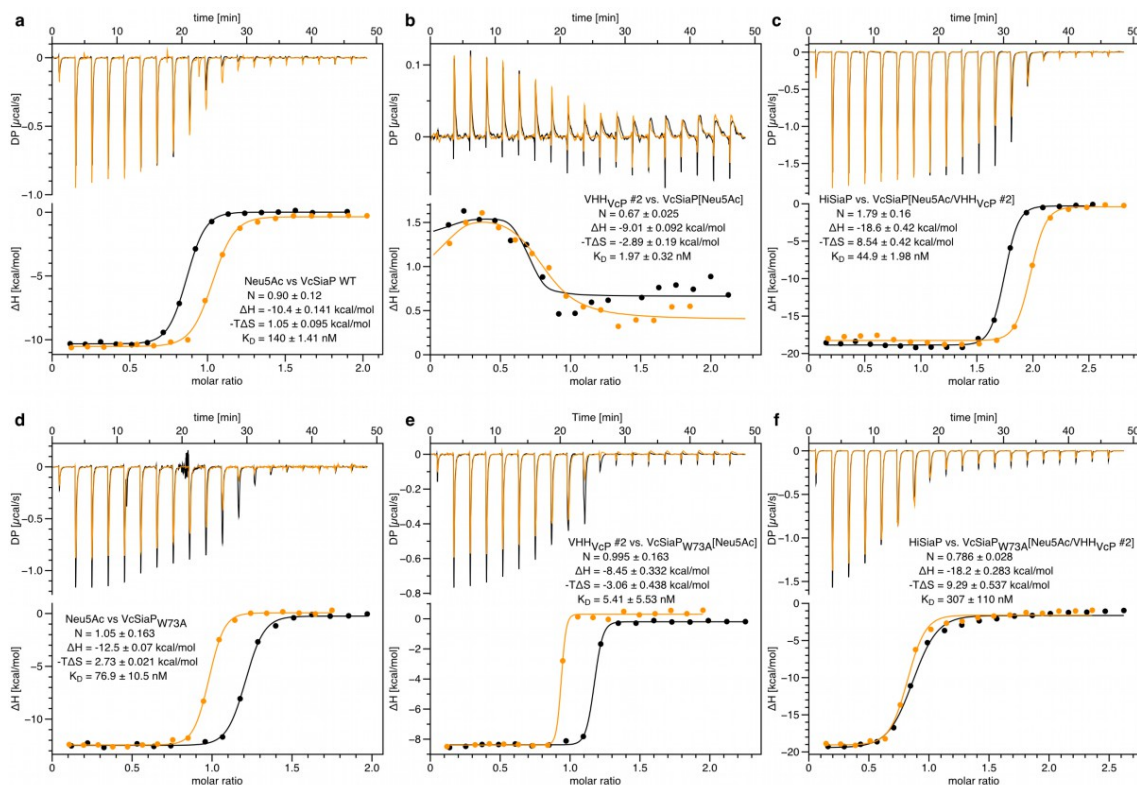

**Supplementary Fig. 4: ITC measurements for VcSiaP and its specific VHHS.** **a) - c)** Both replicates of the measurement presented in Fig. 3 b)-d). **d) - f)** The same experiments as shown in a) - c), but using the VcSiaP W73A mutant instead of the wild-type protein. Therefore, no competitive effect was observed for the titration of VHH\_Vc#2 to VcSiaP W73A[Neu5Ac] (e). One measurement series is shown in orange and one in black (n=2, technical replicate).

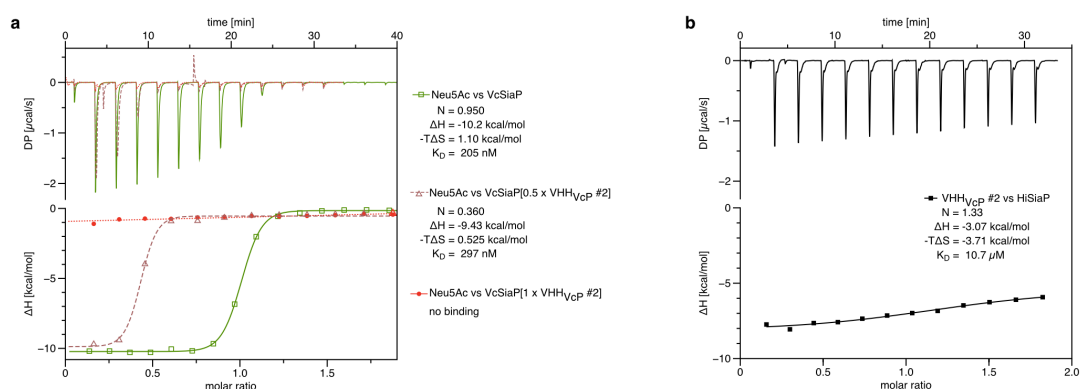

**Supplementary Fig. 5: Inhibitory effect of VHH\_VcP#2 on VcSiaP substrate binding. a)** ITC experiments showing that VcSiaP loaded with an equimolar amount of VHH\_VcP#2 cannot bind Neu5Ac (red). The same experiment, but preincubating VcSiaP with a sub-molar amount of VHH\_VcP#2, shows that P-domain which is not in complex with the VHH is able to bind Neu5Ac (dashed red line). The titration of Neu5Ac towards VcSiaP (green) is included as a reference. The binding parameters calculated from the corresponding curves are shown on the right. The titration of Neu5Ac to VcSiaP was performed  $n > 5$ , biological replicates, the titration of Neu5Ac to VcSiaP + VHH<sub>VcP</sub> #2 (1:1) was done twice ( $n = 2$ , technical replicates) and the titration of Neu5Ac to VcSiaP + VHH<sub>VcP</sub> #2 (1:0.5) was done once ( $n = 1$ ). **b)** ITC experiment titrating VHH\_VcP #2 to HiSiaP revealed no obvious interaction. However, the calculated binding affinity is in the micromolar range and thus a factor of 1,000 weaker than the VcSiaP binding. The experiment was done twice ( $n = 2$ , technical replicates).

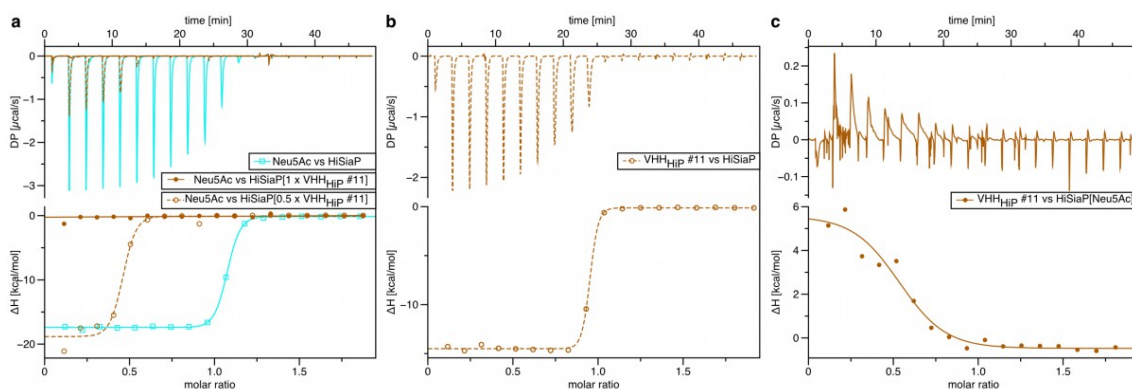

**Supplementary Fig. 6: Inhibitory effect of VHH\_HiP#11 on HiSiaP substrate binding. a)** ITC experiments showing that HiSiaP loaded VHH\_HiP#11 inhibits Neu5Ac binding. An equimolar amount of VHH (solid brown) or a sub-molar amount of VHH (dashed brown) was preincubated with the P-domain. The titration of Neu5Ac towards HiSiaP (cyan) is included as a reference. **b)** ITC data for the binding of VHH<sub>HiP</sub> #11 to HiSiaP in the absence of sialic acid. **c)** ITC data for the binding of VHH<sub>HiP</sub> #11 to substrate bound HiSiaP. All experiments were done once ( $n = 1$ ).

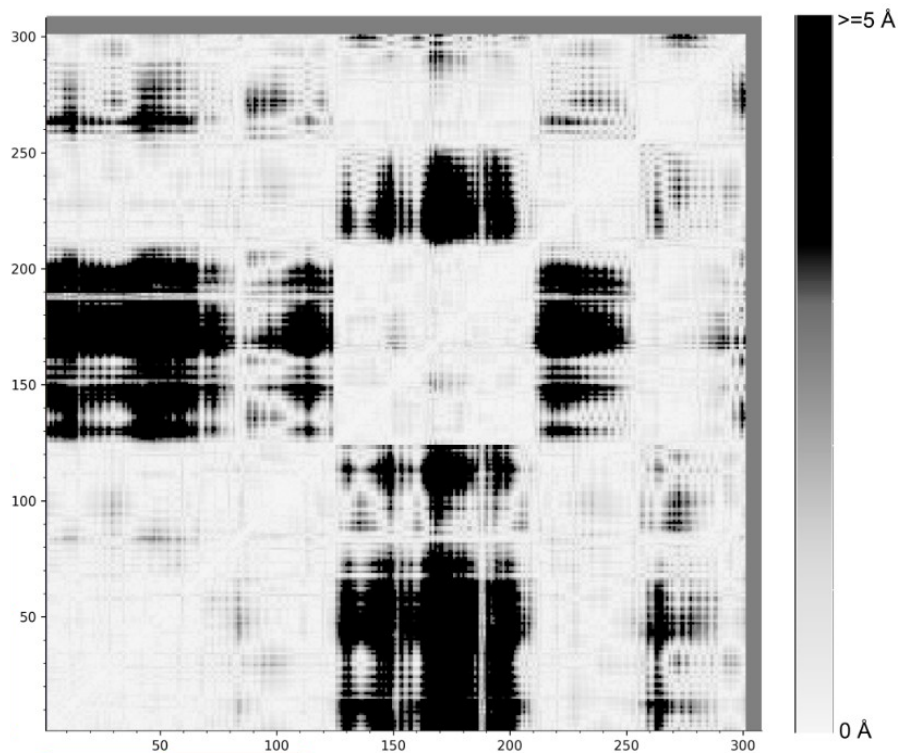

**Supplementary Fig. 7: Difference distance matrix of VcSiaP in its open- and closed-state.** The white to black gradient visualizes the positional change between each pair of residues of VcSiaP. A magnification of this matrix that focusses on the N-terminal lobe of the P-domain is included in Fig. 6 a.

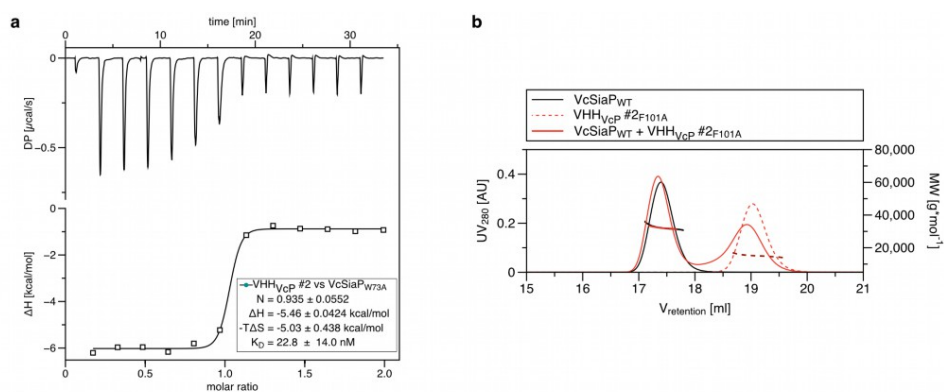

**Supplementary Fig. 8: Binding behavior of VHH\_VcP#2 to VcSiaP W73A and VHH\_VcP#2 F101A to VcSiaP.** **a)** ITC experiments showing that VHH\_VcP#2 binds to the W73A mutant of VcSiaP in the same order of magnitude as to the wild-type. The experiment was done twice ( $n=2$ , technical replicates). **b)** SEC MALS analysis revealed that an F101A mutant of VHH\_VcP#2 binds VcSiaP weakly. The SEC MALS measurement was done once ( $n=1$ ).

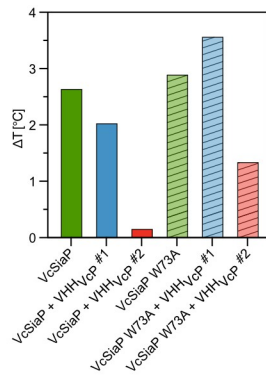

**Supplementary Fig. 9: Thermal stabilization of sialic acid on VcSiaP and its VHH-complexes.** While wild type VcSiaP bound to VHH\_VcP#2 cannot be stabilized by addition of sialic acid, this behavior can be recovered by mutating W73 to an alanine. All measurements were performed as technical duplicates (n=2).

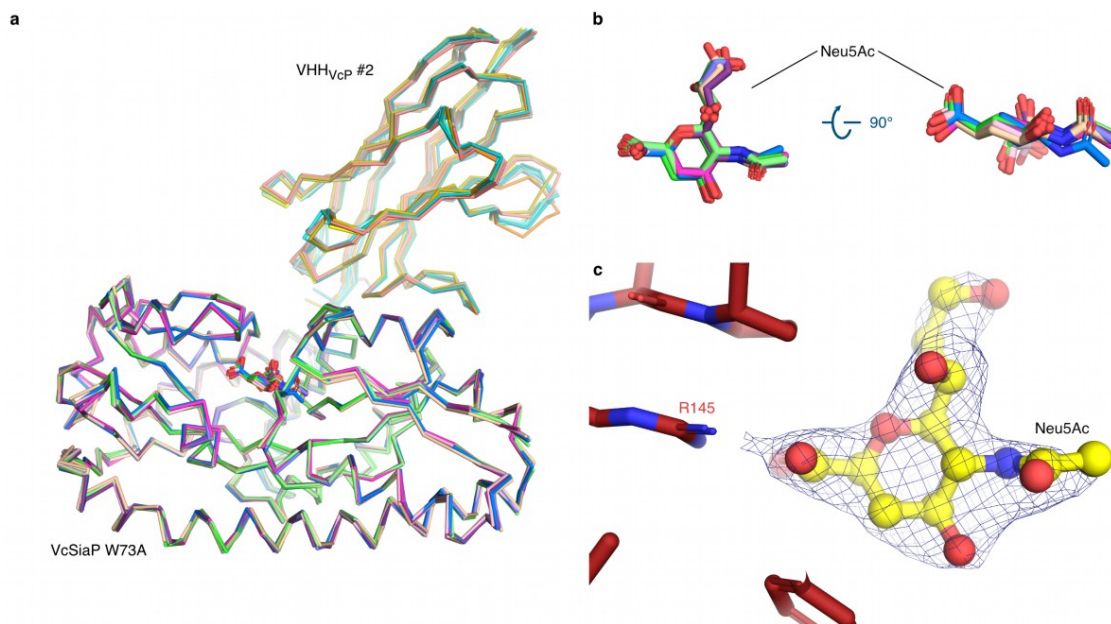

**Supplementary Fig. 10: Crystal Structure of VcSiaP W73A bound to Neu5Ac and VHH\_VcP#2.** **a)** Superposition of all 12 individual VcSiaP–VHH\_VcP#2 complexes within the asymmetric unit. Each dimer was handled as one object and superimposed on the basis of the P-domain. The protein chains are shown as ribbon representation and sialic acid in the binding pocket as sticks. **b)** Magnification of the bound sialic acid from the superposition shown in a). **c)** Neu5A (yellow ball and stick model) is shown inside its electron density and the conserved interaction between Arg145 and the carboxylic acid group can be seen.



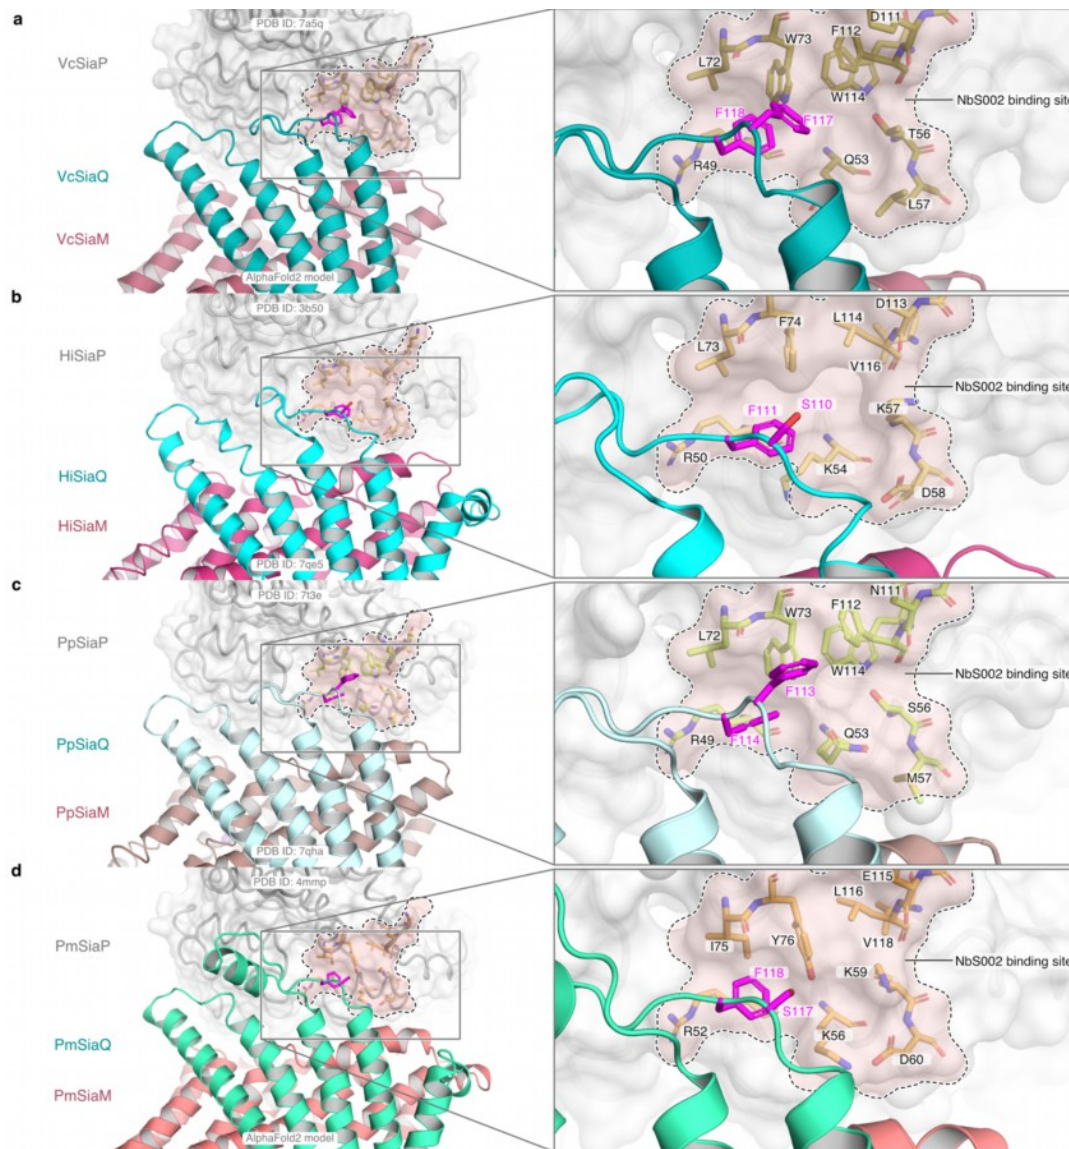

**Supplementary Fig. 11: The hydrophobic surface area that is part of the VHH<sub>VcP</sub> #2 binding site, is conserved among sialic acid TRAP transporters.**

**a-d)** Model of the tripartite SiaPQM complex from different organisms as shown in Fig. 8 for VcSiaPQM (a) and HiSiaPQM (b). For reasons of clarity, the TRAP transporters from *Vibrio cholerae* (a) and *Haemophilus influenzae* (b) are again included. The tripartite complexes from *Photobacterium profundum* (c) and *Pasteurella multocida* (d) are depicted in the same way. All models were built up from AlphaFold2 predictions and experimental structures as annotated. The binding area of VHH<sub>VcP</sub> #2 is highlighted and labelled. The Q (teal) and M (red) transmembrane domains are depicted as cartoon model and the P-domain is shown as surface representation. On the right-hand-side, a magnification of the region of interest is shown and the highlighted amino acid residues are labeled.
