# Supplementary material for: Allosteric substrate release by a sialic acid TRAP transporter substrate binding protein
Source: PubMed Central journal article supplement (PMC11585616; doi:10.1038/s42003-024-07263-6), 2024-11-23
Supplement: 42003_2024_7263_MOESM2_ESM.pdf [file 42003_2024_7263_MOESM2_ESM.pdf]

## Description of Additional Supplementary Files

**File name:** Supplementary Data 1

**Description:** source data for all graphs
